# Supplementary material for: Vergleich unterschiedlicher Instrumente zur Messung von Gesundheitskompetenz im Zusammenhang mit Lesekompetenz und kognitiven Fähigkeiten von Jugendlichen
Source: Atypon-hosted journal article supplement (doi:10.1026/0012-1924/a000297), 2022-09-12
Supplement: 0012-1924_a000297_esm1.pdf [file 0012-1924_a000297_esm1.pdf]

*Elektronisches Supplement 1. Mittelwert (M), Standardabweichung (SD), Trennschärfe ( $r_{tt}$ ) und Faktorladung bei einfaktorieller Lösung der Items des Instruments eHEALS.*

|         | <i>M</i> | <i>SD</i> | $r_{tt}$ | Faktorladung |
|---------|----------|-----------|----------|--------------|
| eHeals1 | 3.58     | 1.13      | .58      | .72          |
| eHeals2 | 3.82     | 1.21      | .52      | .67          |
| eHeals3 | 2.82     | 1.24      | .54      | .67          |
| eHeals4 | 3.21     | 1.31      | .56      | .70          |
| eHeals5 | 4.06     | 1.06      | .42      | .56          |
| eHeals6 | 3.25     | 1.27      | .58      | .71          |
| eHeals7 | 3.42     | 1.28      | .50      | .63          |
| eHeals8 | 3.26     | 1.27      | .39      | .51          |
