# Supplementary material for: Vergleich unterschiedlicher Instrumente zur Messung von Gesundheitskompetenz im Zusammenhang mit Lesekompetenz und kognitiven Fähigkeiten von Jugendlichen
Source: Atypon-hosted journal article supplement (doi:10.1026/0012-1924/a000297), 2022-09-12
Supplement: 0012-1924_a000297_esm2.pdf [file 0012-1924_a000297_esm2.pdf]

*Elektronisches Supplement 2. Korrelationsmatrix der Items des Instruments eHEALS.*

|         | eHeals2 | eHeals3 | eHeals4 | eHeals5 | eHeals6 | eHeals7 | eHeals8 |
|---------|---------|---------|---------|---------|---------|---------|---------|
| eHeals1 | .46**   | .40**   | .50**   | .32**   | .39**   | .27**   | .30**   |
| eHeals2 |         | .30**   | .39**   | .37**   | .39**   | .30**   | .19**   |
| eHeals3 |         |         | .55**   | .18**   | .42**   | .30**   | .28**   |
| eHeals4 |         |         |         | .28**   | .33**   | .25**   | .28**   |
| eHeals5 |         |         |         |         | .31**   | .30**   | .22**   |
| eHeals6 |         |         |         |         |         | .54**   | .26**   |
| eHeals7 |         |         |         |         |         |         | .31**   |

*Anmerkungen: \*\*  $p < .01$ .*
