# Supplementary material for: Vergleich unterschiedlicher Instrumente zur Messung von Gesundheitskompetenz im Zusammenhang mit Lesekompetenz und kognitiven Fähigkeiten von Jugendlichen
Source: Atypon-hosted journal article supplement (doi:10.1026/0012-1924/a000297), 2022-09-12
Supplement: 0012-1924_a000297_esm3.pdf [file 0012-1924_a000297_esm3.pdf]

*Elektronisches Supplement 3.* Mittelwert ( $M$ ), Standardabweichung ( $SD$ ), Trennschärfe ( $r_{tt}$ ) und Faktorladung bei zweifaktorieller Lösung der Items des Instruments HLS-EU (Kurzform).

|       | $M$  | $SD$ | $r_{tt}$ | Faktorladung<br>Faktor 1 | Faktorladung<br>Faktor 2 |
|-------|------|------|----------|--------------------------|--------------------------|
| HLS1  | 3.81 | 0.98 | .49      | .58                      | .21                      |
| HLS2  | 3.81 | 0.94 | .48      | .56                      |                          |
| HLS3  | 3.53 | 1.10 | .41      | .49                      | .30                      |
| HLS4  | 4.09 | 0.98 | .54      | .64                      | -.39                     |
| HLS5  | 3.98 | 0.95 | .51      | .61                      | -.34                     |
| HLS6  | 4.12 | 0.93 | .53      | .64                      | -.47                     |
| HLS7  | 4.12 | 1.01 | .52      | .62                      | -.28                     |
| HLS8  | 3.95 | 0.97 | .50      | .60                      |                          |
| HLS9  | 3.31 | 1.11 | .44      | .52                      | .58                      |
| HLS10 | 3.63 | 1.00 | .55      | .63                      | .34                      |
| HLS11 | 3.84 | 1.00 | .53      | .62                      |                          |
| HLS12 | 3.47 | 1.05 | .51      | .60                      | .25                      |
| HLS13 | 3.85 | 1.01 | .57      | .66                      |                          |
