# Supplementary material for: Vergleich unterschiedlicher Instrumente zur Messung von Gesundheitskompetenz im Zusammenhang mit Lesekompetenz und kognitiven Fähigkeiten von Jugendlichen
Source: Atypon-hosted journal article supplement (doi:10.1026/0012-1924/a000297), 2022-09-12
Supplement: 0012-1924_a000297_esm4.pdf [file 0012-1924_a000297_esm4.pdf]

*Elektronisches Supplement 4. Korrelationsmatrix der Items des Instruments HLS-EU (Kurzform).*

|           | HLS<br>2 | HLS<br>3 | HLS<br>4 | HLS<br>5 | HLS<br>6 | HLS<br>7 | HLS<br>8 | HLS<br>9 | HLS<br>10 | HLS<br>11 | HLS<br>12 | HLS<br>13 |
|-----------|----------|----------|----------|----------|----------|----------|----------|----------|-----------|-----------|-----------|-----------|
| HLS<br>1  | .38**    | .31**    | .25**    | .30**    | .24**    | .26**    | .32**    | .26**    | .32**     | .28**     | .29**     | .29**     |
| HLS<br>2  |          | .27**    | .34**    | .30**    | .25**    | .32**    | .28**    | .28**    | .19**     | .23**     | .23**     | .27**     |
| HLS<br>3  |          |          | .24**    | .23**    | .27**    | .21**    | .25**    | .31**    | .30**     | .15**     | .19**     | .32**     |
| HLS<br>4  |          |          |          | .38**    | .57**    | .35**    | .35**    | .19**    | .31**     | .30**     | .29**     | .31**     |
| HLS<br>5  |          |          |          |          | .36**    | .37**    | .26**    | .13**    | .23**     | .37**     | .28**     | .44**     |
| HLS<br>6  |          |          |          |          |          | .41**    | .30**    | .15**    | .30**     | .34**     | .27**     | .37**     |
| HLS<br>7  |          |          |          |          |          |          | .43**    | .19**    | .28**     | .29**     | .26**     | .32**     |
| HLS<br>8  |          |          |          |          |          |          |          | .25**    | .40**     | .33**     | .25**     | .28**     |
| HLS<br>9  |          |          |          |          |          |          |          |          | .41**     | .29**     | .42**     | .31**     |
| HLS<br>10 |          |          |          |          |          |          |          |          |           | .34**     | .41**     | .37**     |
| HLS<br>11 |          |          |          |          |          |          |          |          |           |           | .28**     | .45**     |
| HLS<br>12 |          |          |          |          |          |          |          |          |           |           |           | .36**     |

*Anmerkungen: \*\*  $p < .01$ .*
