# Supplementary material for: Vergleich unterschiedlicher Instrumente zur Messung von Gesundheitskompetenz im Zusammenhang mit Lesekompetenz und kognitiven Fähigkeiten von Jugendlichen
Source: Atypon-hosted journal article supplement (doi:10.1026/0012-1924/a000297), 2022-09-12
Supplement: 0012-1924_a000297_esm5.pdf [file 0012-1924_a000297_esm5.pdf]

*Elektronisches Supplement 5.* Mittelwert ( $M$ ), Standardabweichung ( $SD$ ), Trennschärfe ( $r_{tt}$ ) und Faktorladung bei einfaktorieller Lösung der Items des Instruments Claim (Kurzform).

|        | $M$ | $SD$ | $r_{tt}$ | Faktorladung |
|--------|-----|------|----------|--------------|
| Claim1 | .61 | 0.49 | .26      | .53          |
| Claim2 | .52 | 0.50 | .29      | .59          |
| Claim3 | .50 | 0.50 | .34      | .65          |
| Claim4 | .51 | 0.50 | .29      | .58          |
| Claim5 | .33 | 0.47 | .30      | .60          |
