# Supplementary material for: Vergleich unterschiedlicher Instrumente zur Messung von Gesundheitskompetenz im Zusammenhang mit Lesekompetenz und kognitiven Fähigkeiten von Jugendlichen
Source: Atypon-hosted journal article supplement (doi:10.1026/0012-1924/a000297), 2022-09-12
Supplement: 0012-1924_a000297_esm6.pdf [file 0012-1924_a000297_esm6.pdf]

*Elektronisches Supplement 6. Korrelationsmatrix der Items des Instruments Claim (Kurzform).*

|        | Claim2 | Claim3 | Claim4 | Claim5 |
|--------|--------|--------|--------|--------|
| Claim1 | .14**  | .18**  | .16**  | .17**  |
| Claim2 |        | .21**  | .15**  | .23**  |
| Claim3 |        |        | .25**  | .19**  |
| Claim4 |        |        |        | .16**  |

*Anmerkungen: \*\*  $p < .01$ .*
